# Supplementary material for: Identification of the target and mode of action for the prokaryotic nucleotide excision repair inhibitor ATBC
Source: Oxford University Press journal article supplement (doi:10.1042/bsr20220403), 2022-05-12
Supplement: bsr-2022-0403_supp.pdf [file bsr-2022-0403_supp.pdf]

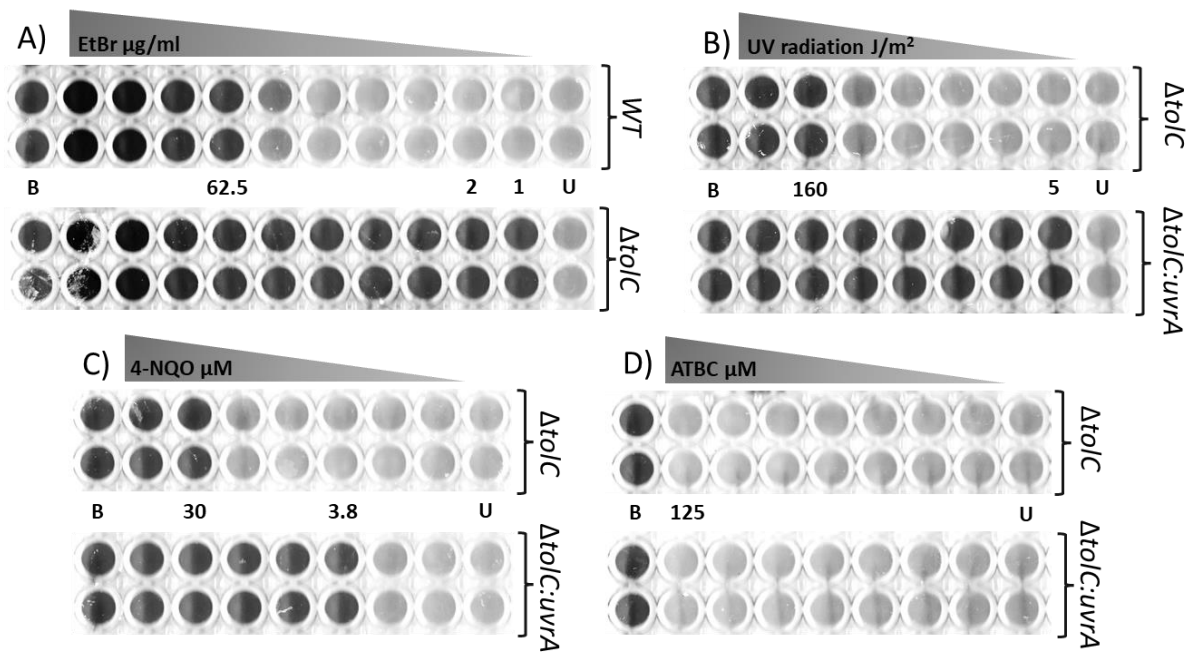

**Figure S1: Determining minimal inhibitory concentrations (MIC).** After 20 h incubation of cells at 37°C (16h incubation prior to the addition of resazurin and further incubation for 4h), the blue color shows no growth, whereas the pink wells represent growing cells (B = MOPS minimal media as sterility control, U = untreated cells). Numbers refer to concentrations or exposure as indicated. A) The EtBr MIC shows a  $\approx$  64-fold increase in sensitivity when the TolC pump is knocked out. B) UV irradiation MIC, shows a  $\approx$  32-fold increase in sensitivity to UV with the *uvrA* knockout. C) 4-NQO MIC shows a 30  $\mu$ M MIC for the compound which decreased 8-fold in the *uvrA* knockout, confirming the compound to be a substrate for NER. D) ATBC MIC, the MIC is  $> 125 \mu$ M for both strains used, indicating ATBC is non-toxic. The experiments were performed in triplicate on three independent days. No appreciable difference was identified among the replicates. This is a black and white reproduction of Figure 2.
